# Supplementary material for: Rigor and reproducibility in human brain organoid research: Where we are and where we need to go
Source: PubMed Central journal article supplement — Stem Cell Reports. 2024 May 16;19(6):796–816. doi: 10.1016/j.stemcr.2024.04.008 (PMC11297560; doi:10.1016/j.stemcr.2024.04.008), 2024-05-16
Supplement: mmc1.pdf [file mmc1.pdf]

**Supplemental Information**

**Rigor and reproducibility in human brain organoid research: Where we are and where we need to go**

**Soraya O. Sandoval, Gerarda Cappuccio, Karina Kruth, Sivan Osenberg, Saleh M. Khalil, Natasha M. Méndez-Albelo, Krishnan Padmanabhan, Daifeng Wang, Mark J. Niciu, Anita Bhattacharyya, Jason L. Stein, André M.M. Sousa, Elisa A. Waxman, Elizabeth D. Buttermore, Dosh Whye, Carissa L. Sirois, Cross-IDDRC Human Stem Cell Consortium, Aislinn Williams, Mirjana Maletic-Savatic, and Xinyu Zhao**

## **Supplemental Information**

Members of Cross- National Institute of Child Health and Human Development (NICHD) Intellectual and Developmental Disorders Research Centers (IDDRC) Human Stem Cell Consortium:

Stewart Anderson: Children's Hospital of Philadelphia  
Anita, Bhattacharyya: University of Wisconsin-Madison  
Elizabeth Buttermore: Boston Children's Hospital  
Qiang Chang: University of Wisconsin-Madison  
Deborah French: Children's Hospital of Philadelphia  
Kazue Hashimoto-Torii (Children National Medical Center  
Harley Kornblum: University of California, Los Angeles  
Kristin Kroll: Washington University.  
Herbert M Lachman: Albert Einstein College of Medicine  
Mirjana Maletic-Savatic: Baylor College of Medicine.  
Mark Niciu: University of Iowa  
Bennett Novitch: University of California, Los Angeles  
Krishnan Padmanabhan: University of Rochester  
Chris Proschel: University of Rochester  
Mustafa Sahin: Boston Children's Hospital  
Andre Sousa: University of Wisconsin-Madison  
Jason Stein: University of North Carolina, Chapel Hill  
Daifeng Wang: University of Wisconsin-Madison  
Elisa Waxman: Children's Hospital of Philadelphia  
Dosh Whye: Boston Children's Hospital  
Aislinn Williams: University of Iowa  
Xinyu Zhao: University of Wisconsin-Madison
