# Supplementary material for: Rigor and reproducibility in human brain organoid research: Where we are and where we need to go
Source: PubMed Central journal article supplement — Stem Cell Reports. 2024 May 16;19(6):796–816. doi: 10.1016/j.stemcr.2024.04.008 (PMC11297560; doi:10.1016/j.stemcr.2024.04.008), 2024-05-16
Supplement: mmc2.pdf [file mmc2.pdf]

**Table S1. Cell lineage markers for analyzing cell types in organoids**

| Markers | Expression                      | Localization | Application in Organoids                                                                                                                          |
|---------|---------------------------------|--------------|---------------------------------------------------------------------------------------------------------------------------------------------------|
| SOX2    | Stem Cells                      | Nuclear      | Qian et al., 2016, Qian et al., 2020; Bhaduri et al., 2020; Tang et al., 2021; Watanabe et al., 2022                                              |
| PAX6    | Early Progenitors               | Nuclear      | Pasca et al., 2015; Pollen et al., 2019; Bhaduri et al., 2020; Tang et al., 2021; Watanabe et al., 2022                                           |
| EOMES   | Intermediate Progenitors        | Nuclear      | Pasca et al., 2015; Pollen et al., 2019; Qiang et al., 2020; Bhaduri et al., 2020; Watanabe et al., 2022                                          |
| HOPX    | Outer Radial Glia               | Nuclear      | Bhaduri et al., 2020; Qiang et al., 2020; Dong et al., 2020                                                                                       |
| NeuN    | Mature neurons                  | Nuclear      | Pasca et al., 2015; Dong et al., 2020                                                                                                             |
| TBR1    | Deep layer neurons (layer VI)   | Nuclear      | Pasca et al., 2015; Dong et al., 2020; Watanabe et al., 2022;                                                                                     |
| BCL11B  | Deep layer neurons (layer V)    | Nuclear      | Pasca et al., 2015; Pollen et al., 2019; Velasco et al., 2019; Qiang et al., 2020; Bhaduri et al., 2020; Dong et al., 2020; Watanabe et al., 2022 |
| SATB2   | Upper layer neurons (layer IV)  | Nuclear      | Pasca et al., 2015; Pollen et al., 2019; Velasco et al., 2019; Qiang et al., 2020; Bhaduri et al., 2020; Tang et al., 2021; Watanabe et al., 2022 |
| POU3F2  | Upper layer neurons (layer III) | Nuclear      | Pasca et al., 2015; Dong et al., 2020                                                                                                             |
| DCX     | Immature neurons                | Cytosolic    | Dong et al., 2020; Huang et al., 2022                                                                                                             |
| TUJ1    | Differentiating neurons         | Cytosolic    | Dong et al., 2020; Tang et al., 2021                                                                                                              |
| MAP2    | Neuronal dendrites              | Cytosolic    | Pasca et al., 2015; Velasco et al., 2019; Dong et al., 2020; Tang et al., 2021; Huang et al., 2022                                                |
| GFAP    | Astrocytes                      | Cytosolic    | Pasca et al., 2015; Velasco et al., 2019; Huang et al., 2022; Watanabe et al., 2022                                                               |
| S100B   | Astrocytes                      | Cytosolic    | Velasco et al., 2019; Huang et al., 2022                                                                                                          |

**Table S2. Software and methods used for quantitative analysis of cell types in organoids**

|                     | <b>Overall Area/Volume</b> | <b>Cell Counting</b> | <b>Layer Thickness</b> | <b>Intensity Measurements</b> |
|---------------------|----------------------------|----------------------|------------------------|-------------------------------|
| <b>ImageJ</b>       | Yes                        | Yes                  | Yes                    | Yes                           |
| <b>MatLab</b>       | Yes                        | Yes                  | No                     | Yes                           |
| <b>Imaris</b>       | Yes                        | Yes                  | Yes                    | Yes                           |
| <b>CellProfiler</b> | Yes                        | Yes                  | No                     | Yes                           |

**Table S3. Tissue clearing and analysis methods**

| Clearing Methods  | Type of solvent     | Microscopy                                                                   | Data Analysis                                                   | Examples                                                                                     |
|-------------------|---------------------|------------------------------------------------------------------------------|-----------------------------------------------------------------|----------------------------------------------------------------------------------------------|
| ClearT2           | Hydrophilic reagent | Zeiss AxioImager M2 microscope with Apotome, Leica SP8 confocal, light-sheet | ImageJ or 3D imaging software(Amira, Imaris, NeuroLucida, etc.) | Boutin and Hoffman-Kim, 2015; Grist et al., 2016; Nurnberg et al., 2020; Diosdi et al., 2021 |
| Sca/e             | Hydrophilic reagent | Confocal, light-sheet microscope                                             | ImageJ or 3D imaging software(Amira, Imaris, NeuroLucida, etc.) | Boutin and Hoffman-Kim, 2015; Diosdi et al., 2021                                            |
| SeeDB             | Hydrophilic reagent | Confocal, Light-Sheet microscope                                             | ImageJ or 3D imaging software(Amira, Imaris, NeuroLucida, etc.) | Boutin and Hoffman-Kim, 2015; Grist et al., 2016                                             |
| Sca/eSQ           | Hydrophilic reagent | Leica SP8 confocal                                                           | ImageJ or 3D imaging software(Amira, Imaris, NeuroLucida, etc.) | Grist et al., 2016                                                                           |
| SHIELD            | Hydrogel embedding  | Light-Sheet microscope                                                       | SCOUT pipeline                                                  | Albanese et al., 2020                                                                        |
| CLARITY           | Hydrogel embedding  | Light-Sheet microscope                                                       | ImageJ or 3D imaging software(Amira, Imaris, NeuroLucida, etc.) | Shnaider and Pristyazhnyuk, 2021                                                             |
| CUBIC             | Hydrophilic reagent | Light-Sheet microscope                                                       | ImageJ or 3D imaging software(Amira, Imaris, NeuroLucida, etc.) | Diosdi et al., 2021, Meng et al., 2023                                                       |
| Fructose-glycerol | Hydrophilic reagent | Confocal, Multi-Photon, Light-Sheet microscope                               | ImageJ or 3D imaging software(Amira, Imaris, NeuroLucida, etc.) | Dekkers et al., 2019                                                                         |
| iDISCO            | Organic             | Leica SP8 confocal                                                           | ImageJ or 3D imaging software(Amira, Imaris, NeuroLucida, etc.) | Birey et al., 2017                                                                           |

**Table S4. Methods used for metabolic assessment.**

Listed in order of increasing complexity and cost

\* indicates high recommendation for entry level analysis of organoid metabolism

|                                    | Assay                                            | Example                                                     | Reference                                                                                                                                                          |
|------------------------------------|--------------------------------------------------|-------------------------------------------------------------|--------------------------------------------------------------------------------------------------------------------------------------------------------------------|
| Terminal Assays                    | Histology/immunofluorescence                     | TOM20, GORASP2, ARCN1, PGK1                                 | Bhaduri 2020 (PMID 31996853), Le 2021 (PMID: 34223837)                                                                                                             |
|                                    | qPCR*                                            | Unfolded protein response genes (e.g. PERK, XBP1s)          | Pasca 2019 (PMID: 31061540)                                                                                                                                        |
|                                    | Seahorse XF                                      | Mitochondrial activity                                      | Zhou 2019 (PMID: 30814486), Le 2021 (PMID: 34223837), Ludikhuize 2021 (PMID: 33778780)                                                                             |
|                                    | Transcriptomics                                  | Enzyme expression                                           | Vertesy 2022 (PMID: 35919947), Huang 2022 (PMID: 35141969), Pollen 2019 (PMID: 30735633), many others                                                              |
|                                    | Metabolomics                                     | Metabolome content (whole and spatially resolved)           | Gomez-Giro 2019 (PMID: 31888773), Notaras 2021 (PMID: 34158620), Sun 2023 (PMID: 37164975)                                                                         |
|                                    | Proteomics                                       | ER stress response and unfolded protein response genes      | Gonzalez-Bohorquez 2022 (PMID: 34996870)                                                                                                                           |
|                                    | Imaging mass spectrometry                        | Spatial mapping of metabolites and lipids                   | Cappuccio 2023 (PMID: 37304070)                                                                                                                                    |
| Live Assays                        | Fluorescent reporters*                           | redox potential of NAD <sup>+</sup> /NADH                   | Martynov 2018 (PMID: 30279147), Jiang et al 2017 (PMID: 28703127), Jiang et al 2019 (PMID: 30358421)                                                               |
|                                    |                                                  | glutathione status                                          |                                                                                                                                                                    |
|                                    | Fluorescence lifetimes imaging microscopy (FLIM) | relative amount of the free or enzyme-bound form of NAD(P)H | Okkelman 2020 (PMID: 31935648), Meleshina 2016 (PMID: 26911347), Meleshina 2017 (PMID: 28129796), Stringari 2012 (PMID: 22891156), Kashirina 2021 (PMID: 34829971) |
|                                    | Genetically encoded pH sensors                   | SypHer-2                                                    | Kashirina 2021 (PMID: 34829971)                                                                                                                                    |
|                                    | NMR                                              | Amino acids, sugars, lactate                                | Sapir 2021 (PMID: 34577579)                                                                                                                                        |
|                                    | Oxygen-sensitive phosphorus nanoparticles        | Oxygen levels                                               | Cho 2021 (PMID: 34354063), Choi 2012 (PMID: 22240511)                                                                                                              |
| Live and Terminal Assays Available | Biochemical assays/plate reader assays*          | Lactate level, glucose level                                | Zhou 2019 (PMID: 30814486), Cho 2021 (PMID: 34354063)                                                                                                              |
